# Supplementary material for: Rational cyano functionalization of copper phenylacetylide paves the way for superior photogenerated electron transport capability and diclofenac degradation
Source: Royal Society of Chemistry journal article supplement (doi:10.1039/d5en00654f), 2025-01-01
Supplement: d5en00654f1.pdf [file d5en00654f1.pdf]

## *Supporting information for*

### **Rational Cyano Functionalization of Copper Phenylacetylide Paves the Way for Superior Photogenerated Electron Transport Capability and Diclofenac Degradation**

*Lingrong Chen<sup>a</sup>, Yishun Wang<sup>a</sup>, Fengyuan Zhang<sup>b</sup>, Yanfang Wang<sup>b</sup>, Yunshuang He<sup>b</sup>, Hongda Zhan<sup>a</sup>, Xiaoyu Zhang<sup>a</sup>, Ping Chen<sup>a,\*</sup>, Zili Lin<sup>a,\*</sup>, Wenying Lv<sup>a,\*</sup>, Guoguang Liu<sup>a</sup>*

*<sup>a</sup> Guangdong Key Laboratory of Environmental Catalysis and Health Risk Control, School of Environmental Science and Engineering, Institute of Environmental Health and Pollution Control, Guangdong University of Technology, Guangzhou 510006, China*

*<sup>b</sup> Guangzhou Wang Lao Ji Great Health Industry Co., Ltd., Guangzhou 510623, China*

**\* Corresponding Author:** Ping Chen; Zili Lin; Wenying Lv

E-mail: [gduatchp@163.com](mailto:gduatchp@163.com) (P. Chen); [zlin9811@163.com](mailto:zlin9811@163.com) (Z. Lin);

[lvwy612@163.com](mailto:lvwy612@163.com) (W. Lv)

Tel: +86-15018448140 ([P. Chen](#)); +86-18138116133 ([Z. Lin](#)); +86-13538982812 ([W. Lv](#))

# Catalogue

|                                                                                                                                                                          |           |
|--------------------------------------------------------------------------------------------------------------------------------------------------------------------------|-----------|
| <b>1 Texts.....</b>                                                                                                                                                      | <b>3</b>  |
| Text S1. Materials .....                                                                                                                                                 | 3         |
| Text S2. Characterizations.....                                                                                                                                          | 3         |
| Text S3. Photoelectrochemical measurements .....                                                                                                                         | 4         |
| Text S4. Photocatalytic experiment .....                                                                                                                                 | 5         |
| Text S5. Quenching experiment .....                                                                                                                                      | 5         |
| Text S6. Synthesis of $\text{PhC}_2\text{Cu}$ .....                                                                                                                      | 5         |
| <b>2 Tables.....</b>                                                                                                                                                     | <b>6</b>  |
| Table S1. HPLC parameters of NSAID. ....                                                                                                                                 | 6         |
| Table S2. BET specific surface area and total pore volume of $\text{PhC}_2\text{Cu}$ and $\text{Cy-PhC}_2\text{Cu}$ .<br>.....                                           | 7         |
| Table S3. Actual water sampling information.....                                                                                                                         | 8         |
| Table S4. Comparison with other materials for the photocatalytic degradation. ....                                                                                       | 9         |
| Table S5. Transformation intermediates for $\text{Cy-PhC}_2\text{Cu}$ degradation of DCF.....                                                                            | 10        |
| Table S6. Pollutant degradation kinetics. ....                                                                                                                           | 12        |
| Table S7. Copper dissolution rate.....                                                                                                                                   | 13        |
| <b>3 Figures .....</b>                                                                                                                                                   | <b>14</b> |
| Fig. S1 Synthesis of $\text{Cy-PhC}_2\text{Cu}$ .....                                                                                                                    | 14        |
| Fig. S2 Photocatalytic reaction device.....                                                                                                                              | 15        |
| Fig. S3 TEM images of $\text{Cy-PhC}_2\text{Cu}$ . ....                                                                                                                  | 16        |
| Fig. S4 Raman spectrum of $\text{PhC}_2\text{Cu}$ and $\text{Cy-PhC}_2\text{Cu}$ . ....                                                                                  | 17        |
| Fig. S5 $\text{N}_2$ adsorption-desorption isotherms (inset shows BJH pore-size distribution) of<br>$\text{PhC}_2\text{Cu}$ (a) and $\text{Cy-PhC}_2\text{Cu}$ (b). .... | 18        |
| Fig. S6 Pollutant degradation kinetics (zero-order, first-order, and second-order).....                                                                                  | 19        |
| Fig. S7 Photocatalytic degradation of DCF in different pH (a). photocatalytic<br>degradation of DCF in different ions (b). ....                                          | 20        |
| Fig. S8 Calculated Fukui-index of DCF. ....                                                                                                                              | 21        |
| Fig. S9 The developmental toxicity of DCF intermediates. ....                                                                                                            | 22        |
| Fig. S10 Liquid chromatogram of DCF intermediate. ....                                                                                                                   | 29        |
| <b>References .....</b>                                                                                                                                                  | <b>30</b> |

# 1 Texts

## Text S1. Materials

Diclofenac (DCF, AR) and 4-hydroxy-2,2,6,6-tetramethylpiperidinyloxy (TEMPOL, AR) were purchased from the Aladdin Industrial Company, China. Sodium oxalate ( $\text{Na}_2\text{C}_2\text{O}_4$ ), tert-Butyl alcohol (TBA, AR), HCl (AR), and NaOH (AR) were obtained from the Chemical Reagent Factory, China. Ultrapure water ( $18.25 \text{ M}\Omega\cdot\text{cm}$ ) supplied by a water purification system (NC-BF10, NICO, China) was utilized for all experiments.

## Text S2. Characterizations

The morphologies of  $\text{PhC}_2\text{Cu}$  and  $\text{Cy-PhC}_2\text{Cu}$  were observed by scanning electron microscopy (SEM, SU8200, Hitachi, Japan). The morphology and composition of  $\text{Cy-PhC}_2\text{Cu}$  composites were observed by transmission electron microscopy (TEM, Talos F200S, Fisher, USA). An X-ray diffractometer (XRD, X'PERT PRO MPD, Netherlands) was used to characterize the crystalline structure of the prepared materials. Fourier transform infrared spectroscopy (FT-IR, Nicolet 6700, Thermo Fisher, USA) was used to characterize the characteristic chemical bonds of the prepared materials. The specific surface area of the material was determined using an automatic specific surface area and porosity analyzer (BET, Micromeritics Tristar 3000, USA). The chemical elements of the prepared materials were analyzed by X-ray photoelectron spectroscopy (XPS, Thermo Fisher, USA). The absorption properties of the photocatalytic materials for visible light were tested with UV-3600 Plus, SHIMADZU, Japan. Photoluminescence (PL) spectra were measured using a fluorescence spectrophotometer (F-4600, Hitachi, Japan) with an excitation wavelength of 378 nm. The intermediate products in the degradation process of diclofenac are detected by high performance liquid chromatography-mass spectrometry (HPLC-MS, Q Exactive, China). The concentration of residual DCF in the samples was determined by liquid chromatograph (HPLC, LC16, SHIMADZU, Japan) with the detection wavelength at 278 nm, column temperature at  $35^\circ\text{C}$ , and sample volume at  $20 \mu\text{L}$ . The main active species in the system were determined by adding quencher, and further verified by electron paramagnetic resonance test (EPR, JES FA 200, JEOL, Japan). All characterization methods are based on CyP-1.0.

### Text S3. Photoelectrochemical measurements

The photoelectrochemical properties of the photocatalysts were investigated using a CEL-NF2000 light power meter (Beijing Zhongjiao Jinyuan Technology Co.; China) electrochemical workstation. A Pt wire electrode served as the counter electrode, and an Ag/AgCl electrode (NHE) acted as the reference electrode. 0.1 M Na<sub>2</sub>SO<sub>4</sub> aqueous solution was used as the electrolyte. For the preparation of the working electrode, 25 mg of the samples were dispersed in 0.4 mL of ethanol and mixed with 60 uL of Nafion 117. The resulting suspension was ultrasonically treated and drop-coated onto ITO glass (1 cm × 1 cm).

In the light response current curve (i-t) experiment, the open circuit voltage test was conducted first, selecting an appropriate bias voltage for dark current measurement. The light baffle was switched every 30 s during this period to alternately test light and dark currents. The current reading on the electrochemical workstation was paused during baffle switching and resumed after the material's current stabilized.

In the electrochemical impedance spectroscopy (EIS) experiment, the open circuit voltage test was performed initially, and the curve values were measured with a frequency ranging from 105 Hz to 0.01 Hz.

Bragg equation

$$2d\sin\theta=n\lambda \quad (S1)$$

Where d is the interplanar spacing of the crystal,  $\theta$  is the angle between the incident X-ray and the crystal plane, n is the diffraction order, and  $\lambda$  is the wavelength of the X-ray.

Tauc formula

$$\alpha h\nu=A(h\nu-E_g)^{1/2} \quad (S2)$$

Where  $\alpha$  is the absorption coefficient, A is the constant,  $h\nu$  is the photon energy, h is the Planck constant,  $\nu$  is the incident photon frequency,  $E_g$  is the semiconductor bandgap width (bandgap).

$$E_{CB}=E_{VB}-E_g \quad (S3)$$

Where,  $E_{CB}$  is a semiconductor conduction band (eV);  $E_{VB}$  is semiconductor price band (eV);  $E_g$  is Band gap (eV).

### Text S4. Photocatalytic experiment

The filtered sample was detected by High-Performance Liquid Chromatography (HPLC) system (Shimadzu HPLC-20A, Japan). The calculation method of DCF removal rate  $R$  is shown in Eq. (S4). In order to further study the reaction kinetics characteristics of Cy-PhC<sub>2</sub>Cu system to DCF degradation, linear fitting was performed according to the pseudo-first-order reaction kinetics model. The calculation formula for photocatalytic rate is shown in Eq. (S5).

$$R = \frac{C_0 - C_t}{C_0} \times 100\% \quad (S4)$$

$$\ln \left( \frac{C_t}{C_0} \right) = -K_{obs}t \quad (S5)$$

Where  $R$  is the removal rate of DCF,  $C_0$  is the initial concentration of DCF (10 mg·L<sup>-1</sup>),  $C_t$  is the concentration of DCF at time  $t$ ,  $K_{obs}$  is the pseudo-first-order kinetic constant (min<sup>-1</sup>), and  $t$  is the reaction time (min).

#### Text S5. Quenching experiment

To identify the main reactive species (ROS), radical quenching experiments were conducted to quench the corresponding ROS through the addition of different scavengers during the photocatalytic process. The scavengers used included 0.1 g of 4-hydroxy-2,2,6,6-tetramethylpiperidinyloxy (TEMPOL), 0.0335 g of sodium oxalate (Na<sub>2</sub>C<sub>2</sub>O<sub>4</sub>), 0.1 mL of furfuryl alcohol (FFA) and 0.2 mL tert-Butyl alcohol (TBA) for superoxide (<sup>-</sup>O<sub>2</sub>), holes (h<sup>+</sup>), singlet oxygen (<sup>1</sup>O<sub>2</sub>) and hydroxyl (<sup>·</sup>OH), respectively.

$$R_{\cdot O_2^-} = \frac{K_{\cdot O_2^-}}{K_{DCF}} \approx 1 - \frac{K_{TEMPOL}}{K_{DCF}} \quad (S6)$$

$$R_{h^+} = \frac{K_{h^+}}{K_{DCF}} \approx 1 - \frac{K_{Na_2C_2O_4}}{K_{DCF}} \quad (S7)$$

$$R_{\cdot OH} = \frac{K_{^1O_2}}{K_{DCF}} \approx 1 - \frac{K_{FFA}}{K_{DCF}} \quad (S8)$$

$$R_{^1O_2} = \frac{K_{\cdot OH}}{K_{DCF}} \approx 1 - \frac{K_{TBA}}{K_{DCF}} \quad (S9)$$

In the Eqs. (S6-9),  $R$  (%) signifies the contribution of reactive species to the photocatalytic degradation of DCF, while  $K$  (min<sup>-1</sup>) denotes the reaction rate constant.

#### Text S6. Synthesis of $\text{PhC}_2\text{Cu}$

The  $\text{PhC}_2\text{Cu}$  was synthesized using a solvothermal method adopted from the literature. The samples were synthesized through combining  $\text{CuCl}_2 \cdot 2\text{H}_2\text{O}$  (0.365 g),  $\text{CH}_3\text{OH}$  (50 mL), triethylamine ( $\text{Et}_3\text{N}$ , 1.12 ml), and phenyl acetylene (0.44 ml) in a beaker, then heating to 70 °C for about 25 min. The reaction was stopped immediately once the flocculant turned light yellow. Finally, the  $\text{PhC}_2\text{Cu}$  was centrifuged and rinsed, and then collected by drying at 60 °C overnight.

## 2 Tables

**Table S1.** HPLC parameters of NSAID.

| NSAID      | Mobile phase composition                  | Column Temperature | Detection wavelength | Chromatographic Column                                  |
|------------|-------------------------------------------|--------------------|----------------------|---------------------------------------------------------|
| Diclofenac | Methanol: 0.2% formic acid<br>80:20 (v:v) | 35 °C              | 276 nm               | Agilent Eclipse XDB-C18 5 $\mu\text{m}$<br>(4.6×150 mm) |

**Table S2.** BET specific surface area and total pore volume of PhC<sub>2</sub>Cu and Cy-PhC<sub>2</sub>Cu.

| Adsorbents             | Surface Area<br>(m <sup>2</sup> ×g <sup>-1</sup> ) | Pore Volume (cm <sup>3</sup> ×g <sup>-1</sup> ) | Pore Size (nm) |
|------------------------|----------------------------------------------------|-------------------------------------------------|----------------|
| PhC <sub>2</sub> Cu    | 37.6799                                            | 0.2566                                          | 27.2416        |
| Cy-PhC <sub>2</sub> Cu | 36.5930                                            | 0.1910                                          | 20.8721        |

**Table S3.** Actual water sampling information.

| Water sample | Sampling location                                                            | Sampling date                 |
|--------------|------------------------------------------------------------------------------|-------------------------------|
| Lake water   | Haizhu Lake, Guangzhou.<br>Guangdong Province, China.                        | May 3, 2024,<br>15: 20 p.m.   |
| Tap-water    | Guangdong University of Technology,<br>Guangzhou, Guangdong Province, China. | May 12, 2024,<br>10: 00 a.m.  |
| River water  | Raoping, Chaozhou,<br>Guangdong Province, China                              | June 14, 2024,<br>15: 30 p.m. |
| Seawater     | Raoping, Chaozhou,<br>Guangdong Province, China                              | June 16, 2024,<br>16: 00 p.m. |

**Table S4.** Comparison with other materials for the photocatalytic degradation.

| Photocatalyst                                                             | Dosage          | Initial<br>Concentration | Light Source                                                                           | $K_{\text{obs}}$<br>( $\text{min}^{-1}$ ) | Photocatalytic<br>Performance     | Ref.             |
|---------------------------------------------------------------------------|-----------------|--------------------------|----------------------------------------------------------------------------------------|-------------------------------------------|-----------------------------------|------------------|
| $\text{Bi}_2\text{O}_{2.33}/\text{Bi}_4\text{O}_5\text{I}_2$              | 167mg/L         | 20 mg/L                  | $\lambda > 420 \text{ nm}$<br>(300 W)                                                  | 0.0275                                    | 97.58 %<br>(200 min)              | [1]              |
| Biomass<br>$\text{C}/\text{Bi}_2\text{WO}_6$                              | 1000 mg/L       | 8 mg/L                   | $\lambda < 420 \text{ nm}$<br>(500 W)                                                  | /                                         | 96.19 %<br>(120 min)              | [2]              |
| In-<br>$\text{CE}_2 (\text{MoO}_4)_3/\text{g-}$<br>$\text{C}_3\text{N}_4$ | 10 mg/L         | 10 mg/L                  | $\lambda > 420 \text{ nm}$<br>(150 W)                                                  | /                                         | 87.0 %<br>(105 min)               | [3]              |
| $\text{g-C}_3\text{N}_4\text{-PVDF}$                                      | 500 mg/L        | 250 $\mu\text{g/L}$      | $\lambda < 405 \text{ nm}$<br>(300 W)                                                  | /                                         | 72.0 %<br>(24 h)                  | [4]              |
| $\text{La}/\text{TiO}_2$                                                  | 500 mg/L        | 50 ppm                   | $\lambda > 400 \text{ nm}$<br>(12 W)                                                   | 0.0016                                    | /<br>(240 min)                    | [5]              |
| $\text{N}/\text{TiO}_2/\text{rGO}$                                        | 250 mg/L        | 10 mg/L                  | $\lambda > 420 \text{ nm}$<br>(70 W)                                                   | 0.0276                                    | 91.08 %<br>(120 min)              | [6]              |
| $\text{Ag}/ \text{g-C}_3\text{N}_4$                                       | 100 mg/L        | 100 mg/L                 | $\lambda > 400 \text{ nm}$<br>(300 W)                                                  | 0.0429                                    | 100 %<br>(120 min)                | [7]              |
| $\text{TiO}_2/\text{ZrO}_2$                                               | 250 mg/L        | 10 mg/L                  | $\lambda = 8 \text{ nm}$<br>(210 W)                                                    | /                                         | 92.41 %<br>(210 min)              | [8]              |
| <b>Cy-PhC<sub>2</sub>Cu</b>                                               | <b>200 mg/L</b> | <b>10 mg/L</b>           | <b>9 W 6.1 mW/cm<sup>2</sup> LED</b><br><b>(<math>\lambda = 455 \text{ nm}</math>)</b> | <b>0.0339</b>                             | <b>96.76%</b><br><b>(100 min)</b> | <b>This work</b> |

**Table S5.** Transformation intermediates for Cy-PhC<sub>2</sub>Cu degradation of DCF.

| Product | Molecular<br>Formula                                            | Mw  | MS <sup>2</sup> /[M+H]<br>- | Probable Structure                                                                    |
|---------|-----------------------------------------------------------------|-----|-----------------------------|---------------------------------------------------------------------------------------|
| P1      | C <sub>14</sub> H <sub>11</sub> Cl <sub>2</sub> NO <sub>2</sub> | 296 | 296.0237                    | 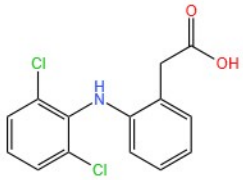   |
| P2      | C <sub>14</sub> H <sub>11</sub> Cl <sub>2</sub> NO <sub>3</sub> | 312 | 312.0184                    |     |
| P3      | C <sub>6</sub> H <sub>5</sub> Cl <sub>2</sub> NO                | 178 | 177.9562                    |    |
| P4      | C <sub>14</sub> H <sub>12</sub> ClNO <sub>3</sub>               | 294 | 294.0557                    |    |
| P5      | C <sub>14</sub> H <sub>12</sub> ClNO <sub>5</sub>               | 310 | 310.0028                    |   |
| P6      | C <sub>14</sub> H <sub>10</sub> ClNO <sub>5</sub>               | 308 | 308.0886                    |   |
| P7      | C <sub>13</sub> H <sub>11</sub> Cl <sub>2</sub> N               | 252 | 252.0153                    |  |
| P8      | C <sub>13</sub> H <sub>10</sub> ClN                             | 216 | 216.0386                    |  |

P9            C<sub>7</sub>H<sub>9</sub>N            108            108.2989

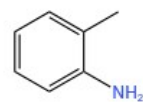

P10           C<sub>14</sub>H<sub>11</sub>Cl<sub>2</sub>NO<sub>3</sub>           312           312.0185

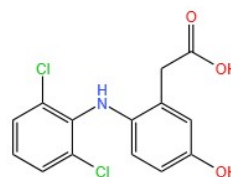

P11           C<sub>14</sub>H<sub>9</sub>Cl<sub>2</sub>NO<sub>3</sub>           310           310.0028

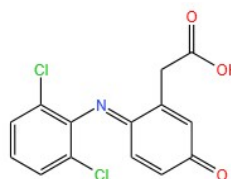

P12           C<sub>13</sub>H<sub>9</sub>Cl<sub>2</sub>NO           266           266.1724

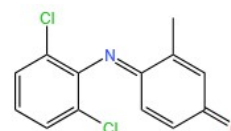

P13           C<sub>13</sub>H<sub>9</sub>Cl<sub>2</sub>NO<sub>2</sub>           282           282.2037

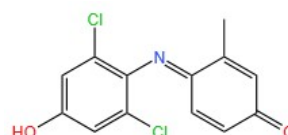

P14           C<sub>6</sub>H<sub>5</sub>Cl<sub>2</sub>N           162           161.9814

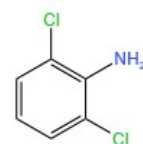

---

**Table S6.** Pollutant degradation kinetics.

| degradation kinetics | zero-order                                   |                | first-order              |                | second-order                                 |                |
|----------------------|----------------------------------------------|----------------|--------------------------|----------------|----------------------------------------------|----------------|
|                      | $k$ (mg·L <sup>-1</sup> ·min <sup>-1</sup> ) | R <sup>2</sup> | $k$ (min <sup>-1</sup> ) | R <sup>2</sup> | $k$ (L·mg <sup>-1</sup> ·min <sup>-1</sup> ) | R <sup>2</sup> |
| PhC <sub>2</sub> Cu  | 0.03180                                      | 0.96014        | 0.00565                  | 0.98238        | 0.00109                                      | 0.99059        |
| CyP-0.5              | 0.03429                                      | 0.98705        | 0.00635                  | 0.95914        | 0.00114                                      | 0.88677        |
| CyP-1.0              | 0.07719                                      | 0.99075        | 0.03385                  | 0.99451        | 0.00665                                      | 0.33341        |
| CyP-1.5              | 0.05221                                      | 0.99302        | 0.01015                  | 0.98888        | 0.00119                                      | 0.98500        |

**Table S7.** Copper dissolution rate.

| Sample                 | Copper content in the sample (mg/L) |
|------------------------|-------------------------------------|
| PhC <sub>2</sub> Cu    | 2.85                                |
| Cy-PhC <sub>2</sub> Cu | 5.20                                |

### 3 Figures

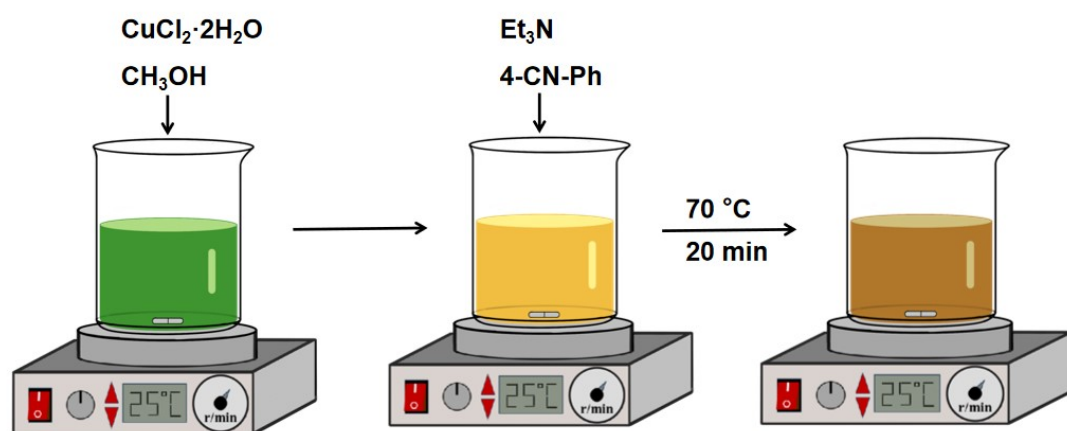

**Fig. S1** Synthesis of Cy-PhC<sub>2</sub>Cu

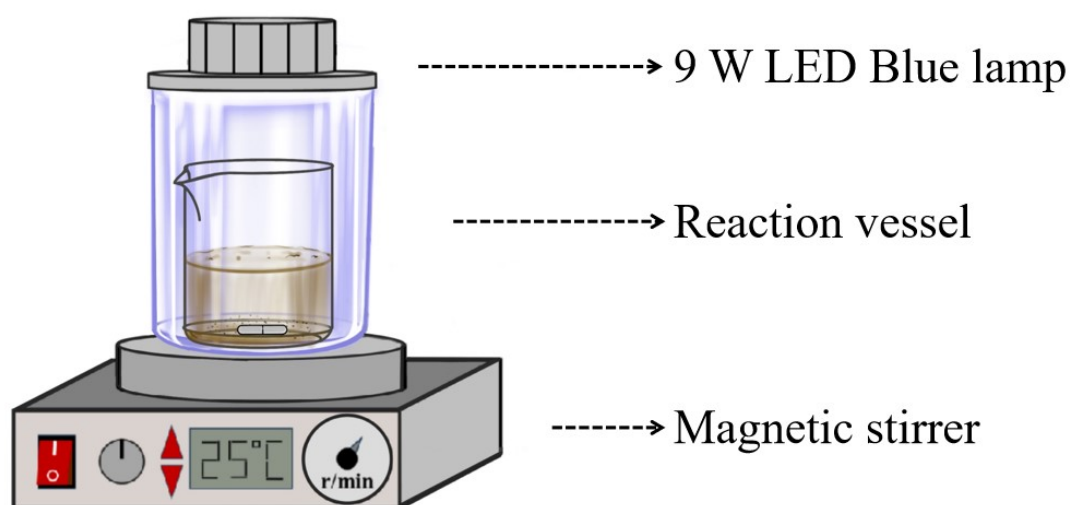

**Fig. S2** Photocatalytic reaction device.

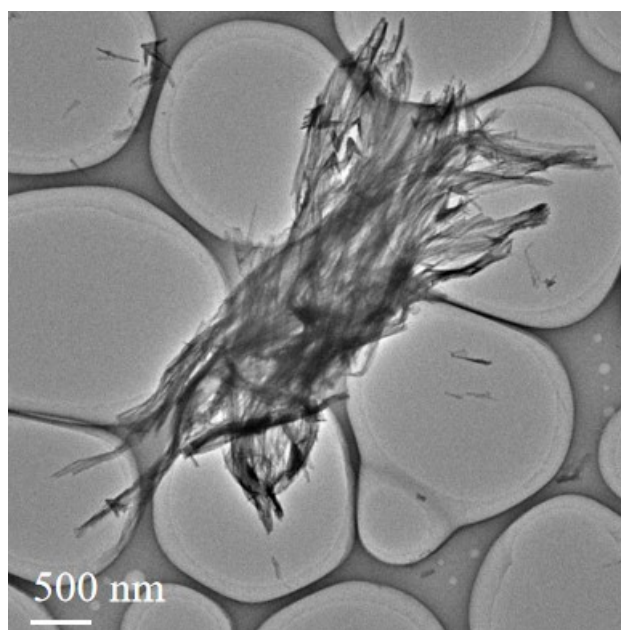

**Fig. S3** TEM images of Cy-PhC<sub>2</sub>Cu.

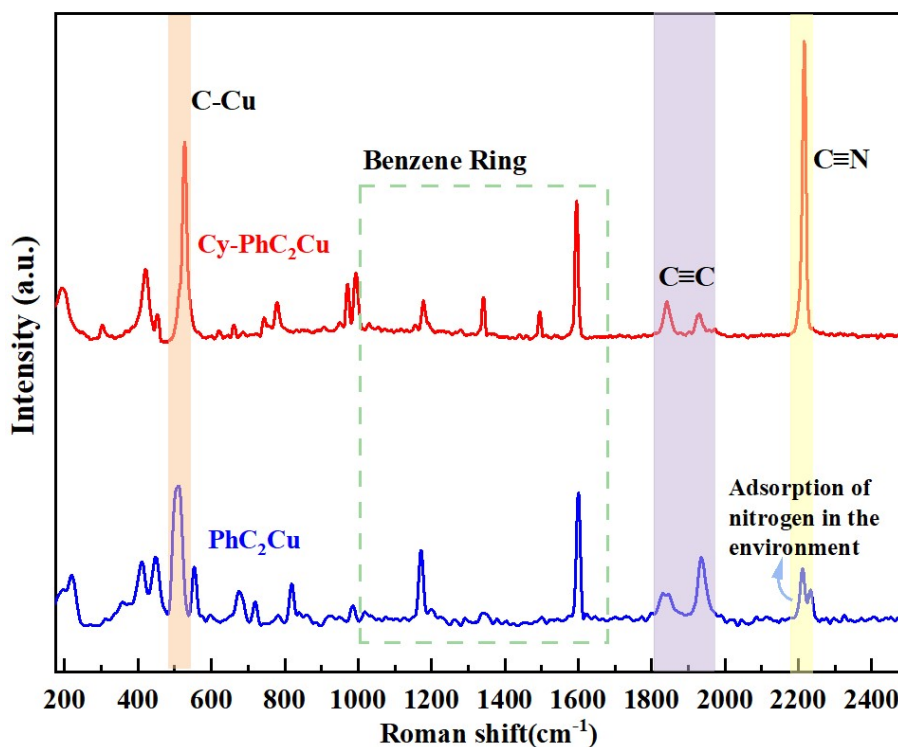

**Fig. S4** Raman spectrum of  $\text{PhC}_2\text{Cu}$  and  $\text{Cy-PhC}_2\text{Cu}$ .

In Fig. S4, the Raman spectra of  $\text{PhC}_2\text{Cu}$  at approximately 1018, 1170, and 1599  $\text{cm}^{-1}$  are characteristic lines of the benzene ring. The Raman bands at 1834 and 1938  $\text{cm}^{-1}$  may be attributed to Fermi resonance and second-order transitions enhanced by  $\nu(\text{C}\equiv\text{C})$ .<sup>9</sup> The Raman band at 509  $\text{cm}^{-1}$  may be attributed to the vibration generated by the coordination interaction between copper and phenylacetylene. It is worth noting that the Raman band of  $\text{PhC}_2\text{Cu}$  at 2214  $\text{cm}^{-1}$  can be attributed to the adsorbed nitrogen-containing compound, which is consistent with the research of Zhao et al.,<sup>10</sup> and due to the introduction of the cyano group,  $\text{Cy-PhC}_2\text{Cu}$  exhibits stronger Raman vibrations at the corresponding location.

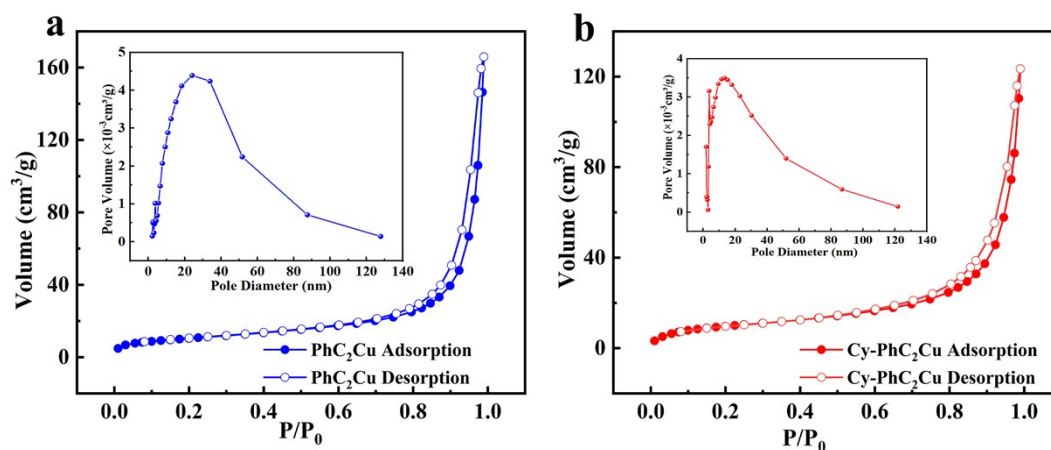

**Fig. S5** N<sub>2</sub> adsorption-desorption isotherms (inset shows BJH pore-size distribution) of PhC<sub>2</sub>Cu (a) and Cy-PhC<sub>2</sub>Cu (b).

The surface properties of the photocatalysts were characterized by N<sub>2</sub> adsorption-desorption analysis (Fig. S5). Both synthesized catalysts exhibited type IV isotherms, confirming their mesoporous structures. According to Table S2, due to the three-dimensional effect of -CN occupying the pore size, the introduction of cyano did not significantly change the specific surface area of the material, indicating that its adsorption capacity may decrease.

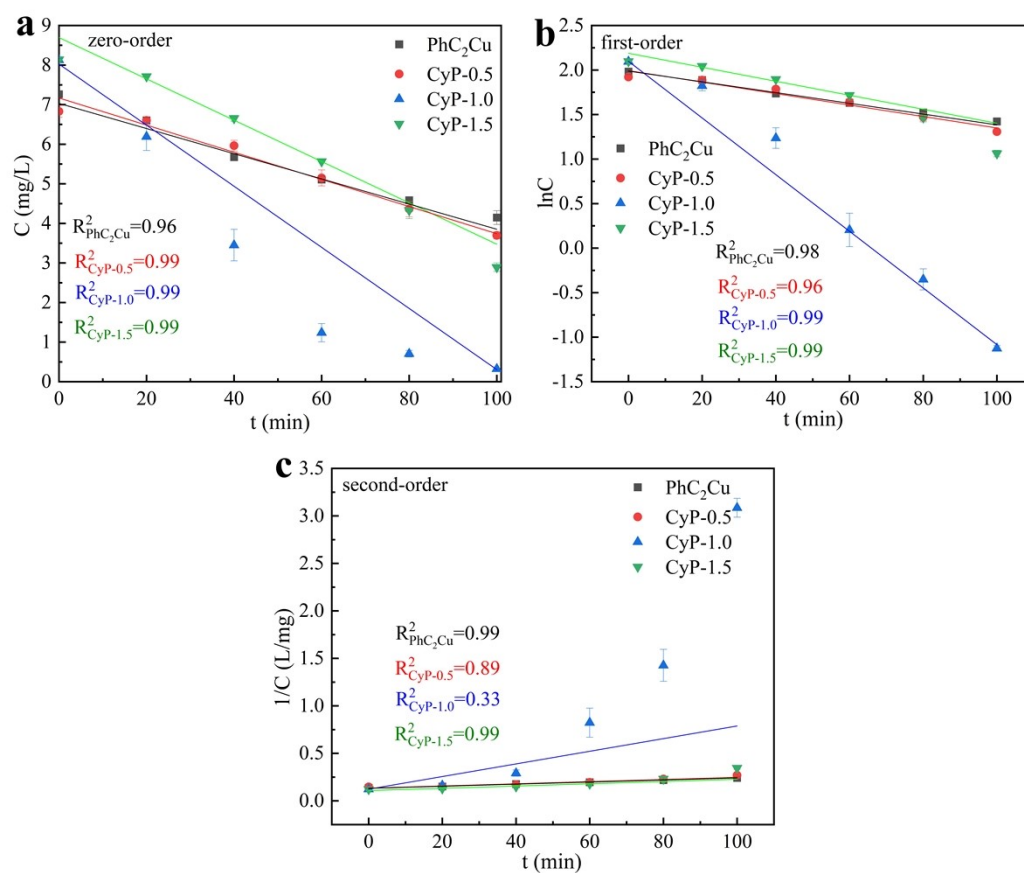

**Fig. S6** Pollutant degradation kinetics (zero-order, first-order, and second-order).

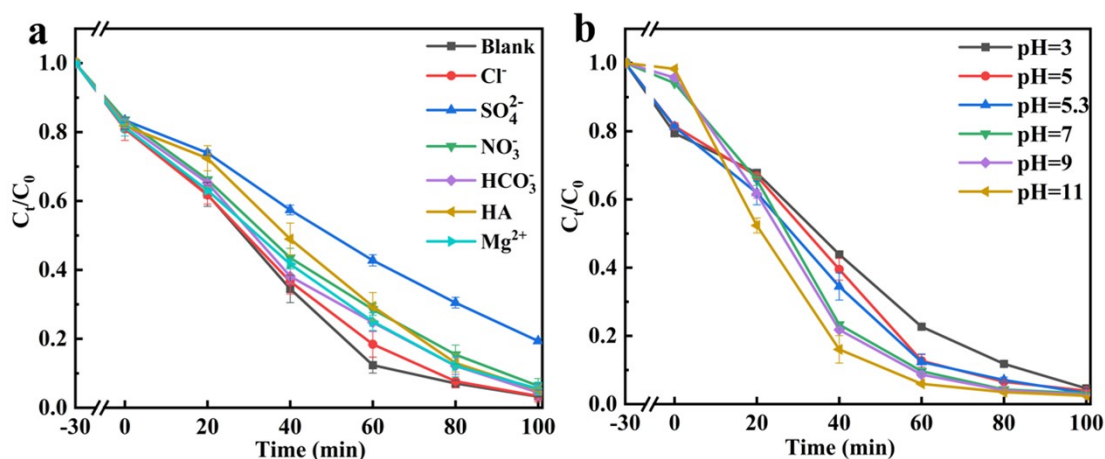

**Fig. S7** Photocatalytic degradation of DCF in different ions (a). Photocatalytic degradation of DCF in different pH (b).

In Fig. S7a, photocatalytic degradation experiments of DCF were carried out under blank control condition,  $\text{Cl}^-$ ,  $\text{SO}_4^{2-}$ ,  $\text{NO}_3^-$ ,  $\text{HCO}_3^-$ , HA and  $\text{Mg}^{2+}$ , respectively. The degradation efficiencies of DCF were 96.76%, 96.61%, 80.63%, 93.66%, 95.58%, 94.82% and 94.49%, respectively. In addition, testing the degradation degree of DCF at pH 3, 5, 5.3 (blank control), 7, 9 and 11, and the degradation efficiencies were 95.41%, 96.06%, 96.76%, 96.87%, 97.26% and 97.55%, respectively (Fig. S7b).

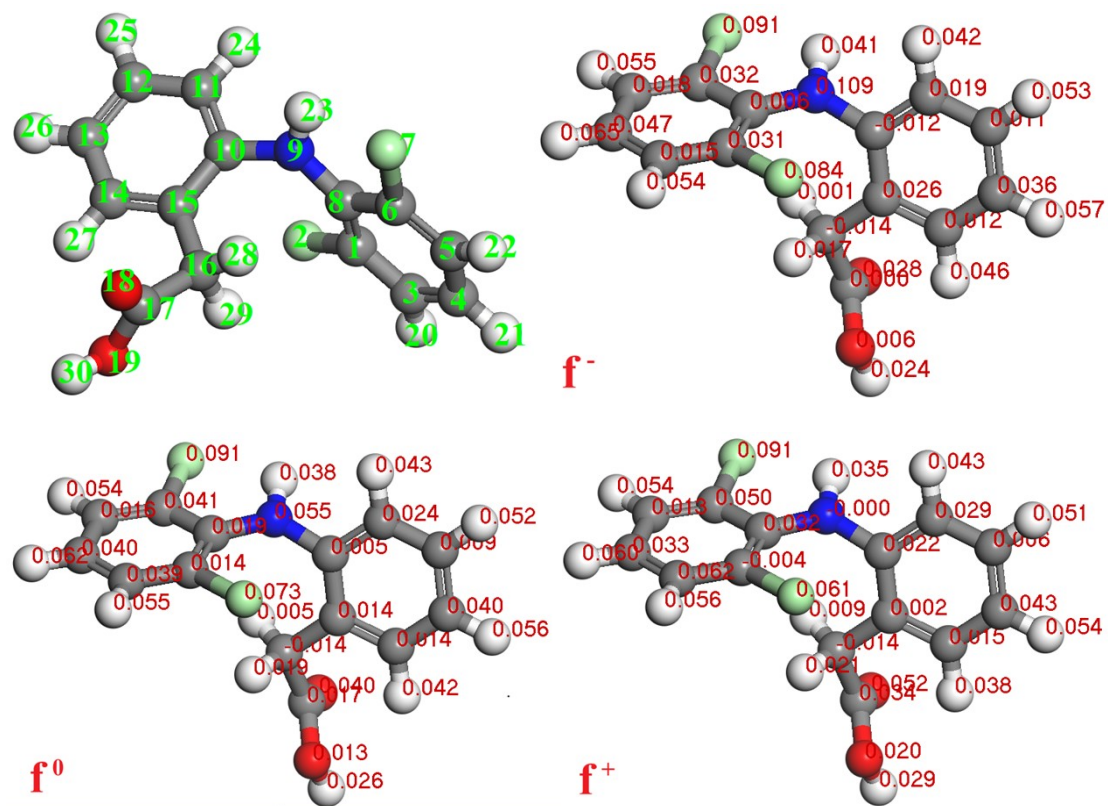

Fig. S8 Calculated Fukui-index of DCF.

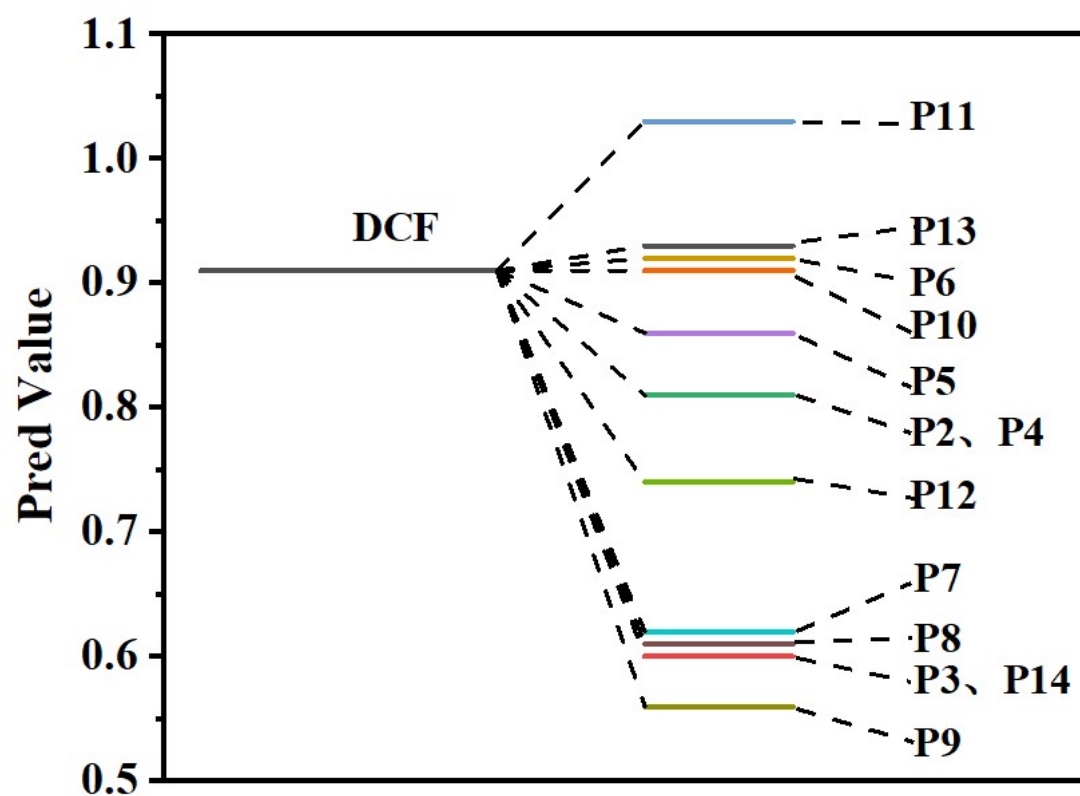

Fig. S9 The developmental toxicity of DCF intermediates.

1 #4267 RT: 14.57 AV: 1 NL: 1.24E8  
T: FTMS + p ESI Full ms [50.0000-750.0000]

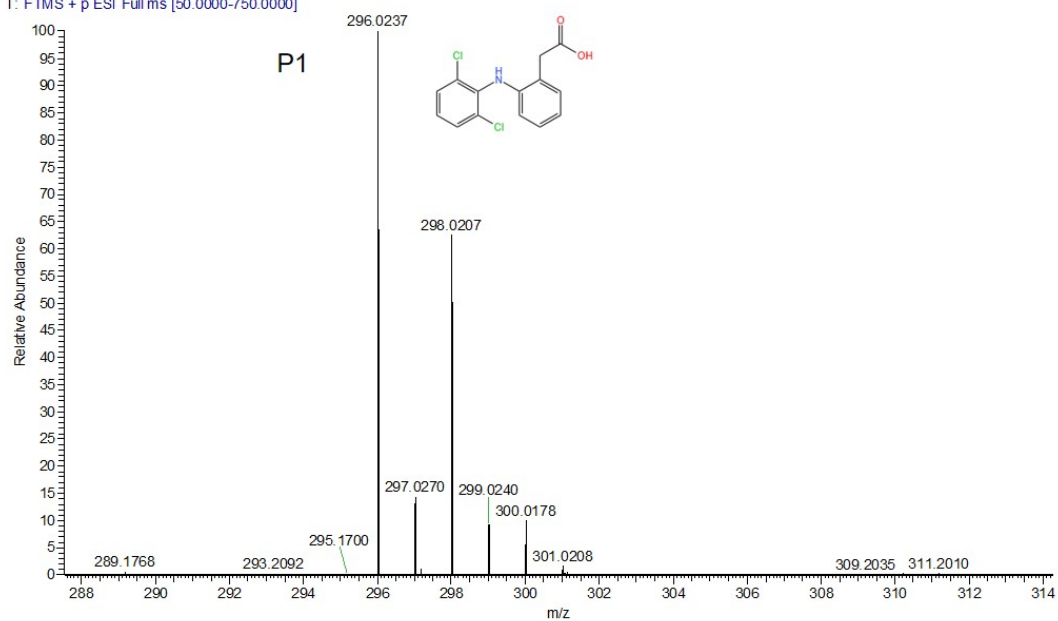

1 #4029 RT: 13.75 AV: 1 NL: 4.04E6  
T: FTMS + p ESI Full ms [50.0000-750.0000]

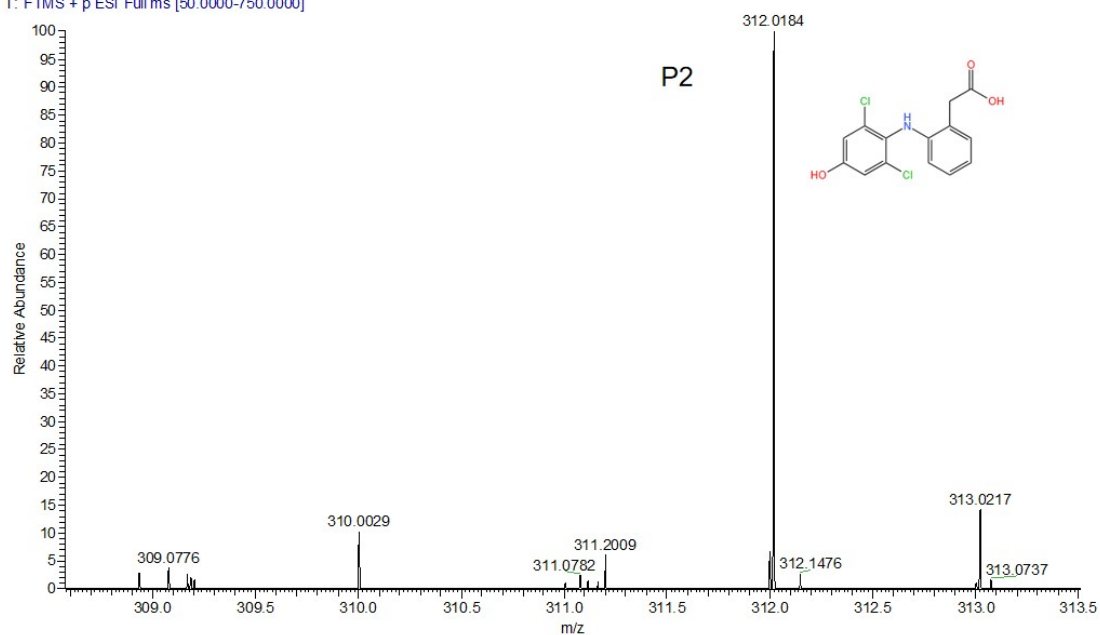

1 #1163 RT: 3.69 AV: 1 NL: 1.19E6  
T: FTMS + p ESI Full ms [50.0000-750.0000]

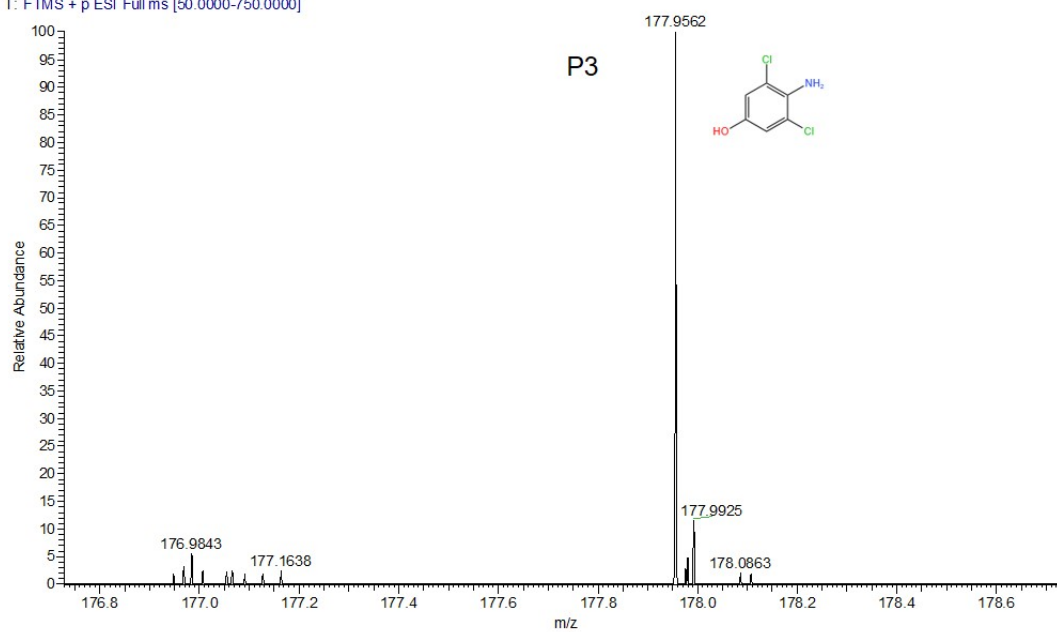

1 #3066 RT: 10.13 AV: 1 NL: 6.19E5  
T: FTMS + p ESI Full ms [50.0000-750.0000]

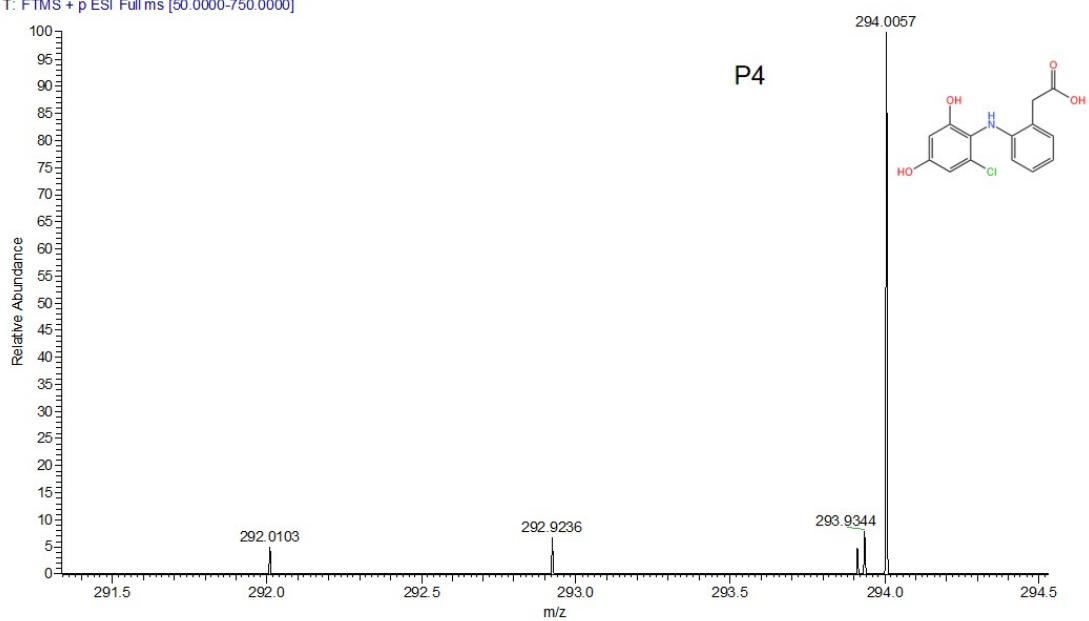

1 #3893 RT: 13.28 AV: 1 NL: 5.29E6  
T: FTMS + p ESI Full ms [50.0000-750.0000]

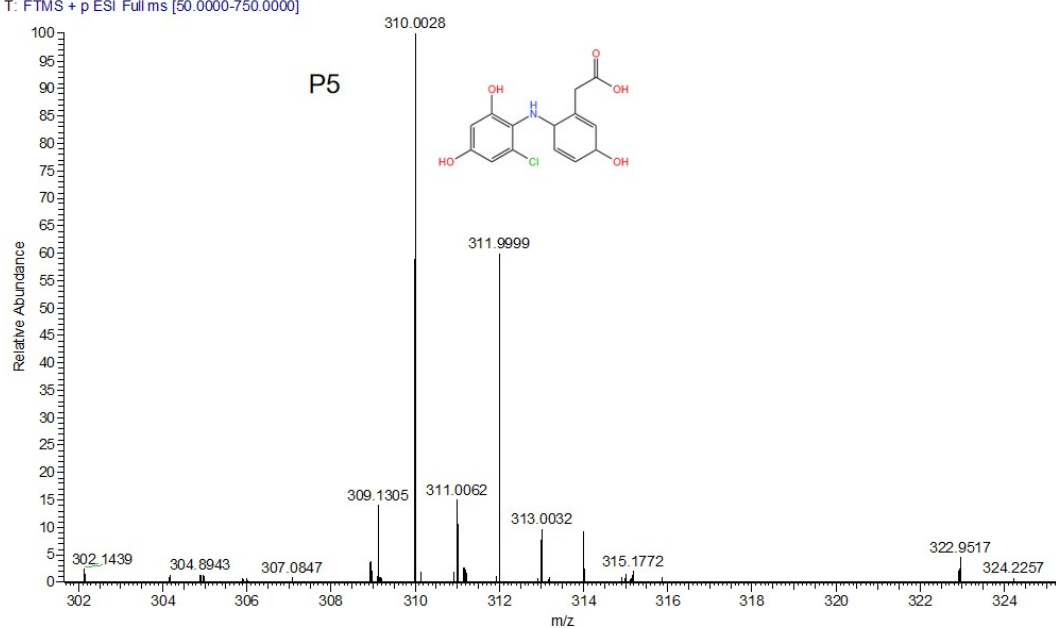

1 #3953 RT: 13.50 AV: 1 NL: 1.68E6  
T: FTMS + p ESI Full ms [50.0000-750.0000]

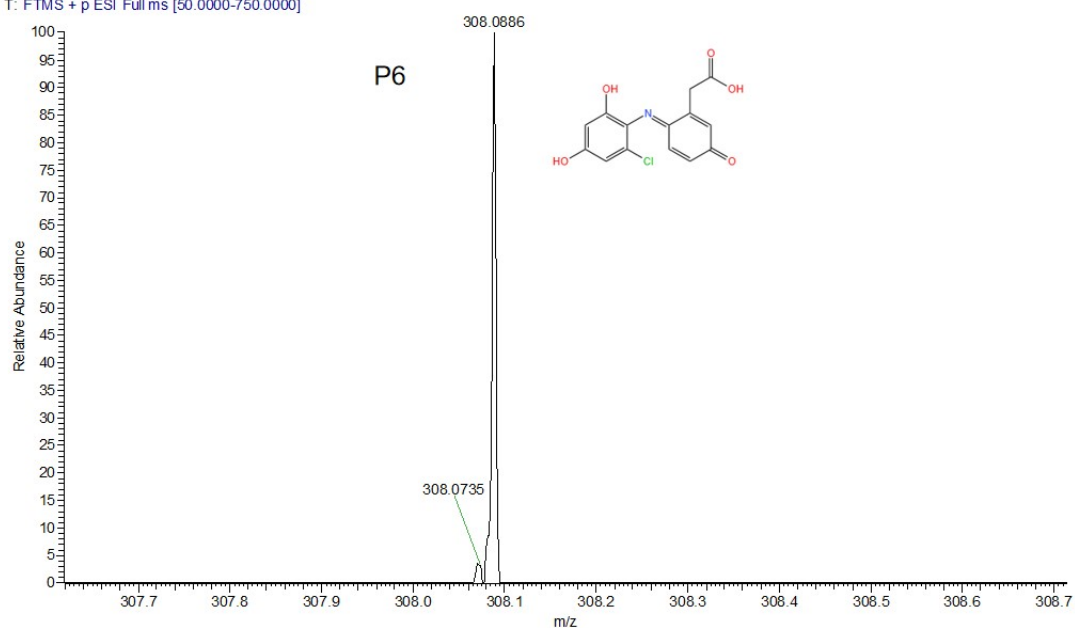

1 #4267 RT: 14.57 AV: 1 NL: 3.42E6  
T: FTMS + p ESI Full ms [50.0000-750.0000]

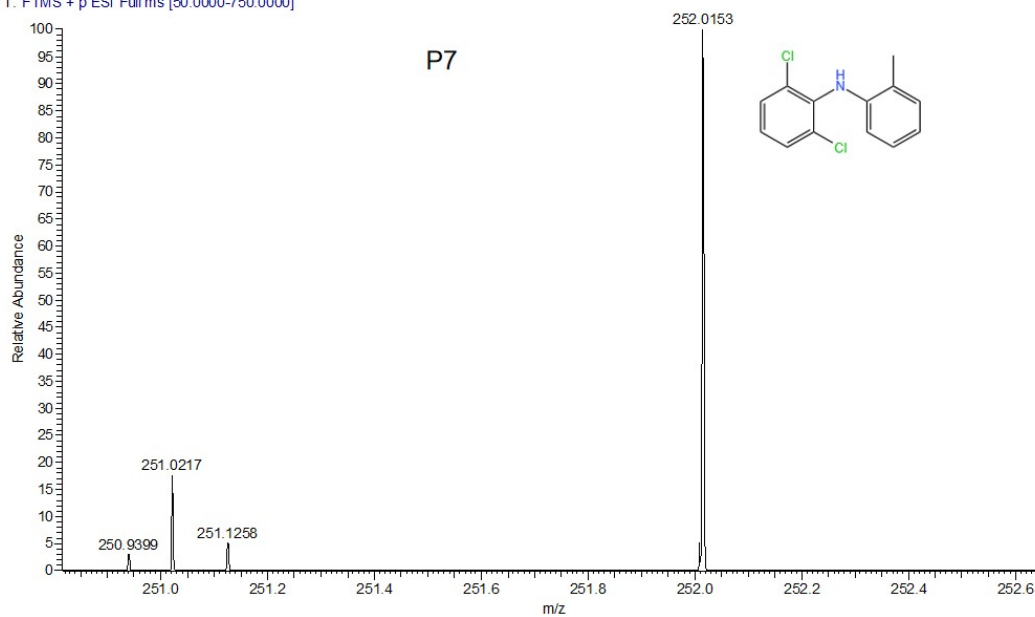

1 #4267 RT: 14.57 AV: 1 NL: 2.07E6  
T: FTMS + p ESI Full ms [50.0000-750.0000]

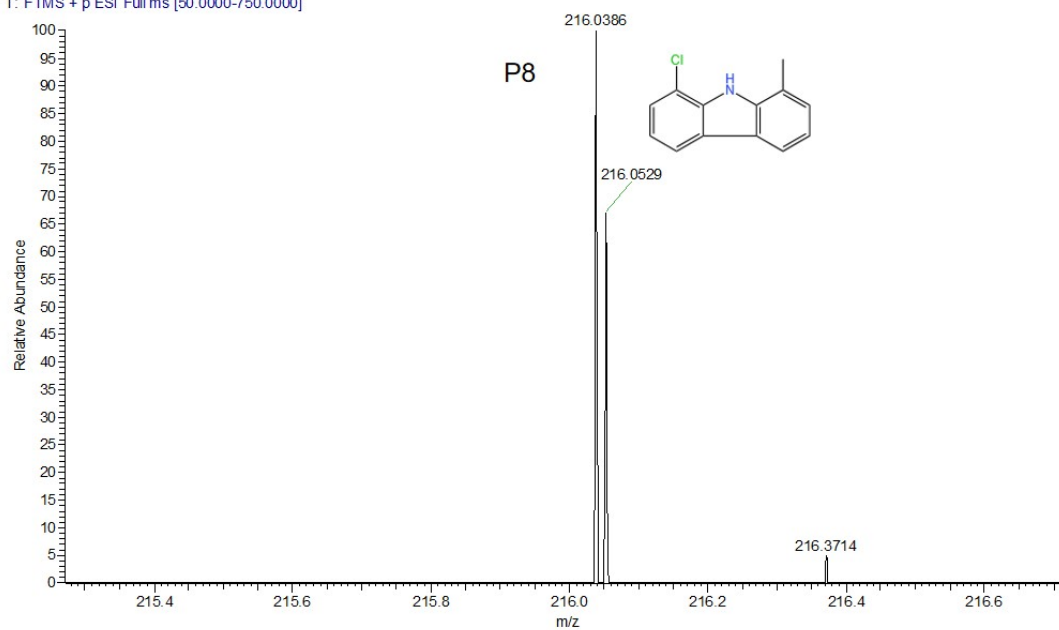

1 #3828 RT: 13.05 AV: 1 NL: 2.65E4  
T: FTMS + p ESI Full ms [50.0000-750.0000]

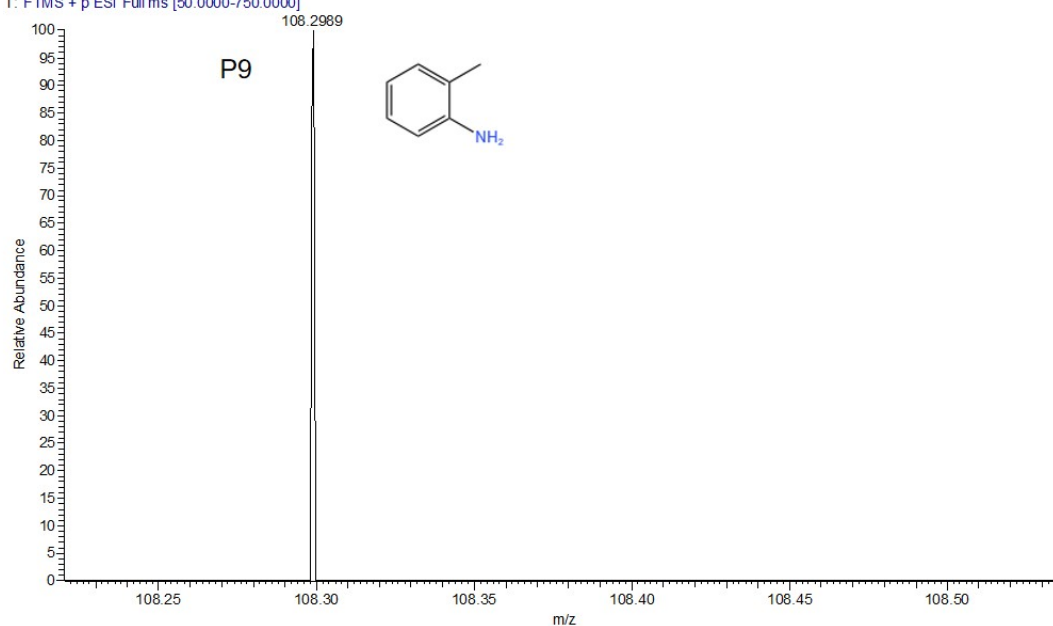

1 #4017 RT: 13.72 AV: 1 NL: 7.03E6  
T: FTMS + p ESI Full ms [50.0000-750.0000]

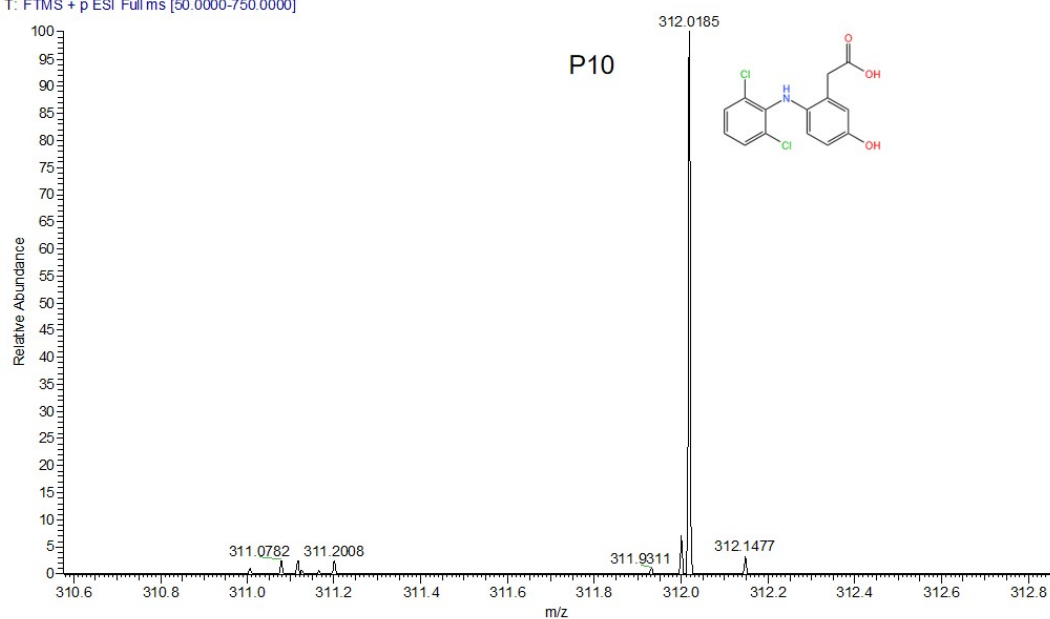

1 #3893 RT: 13.28 AV: 1 NL: 5.29E6  
T: FTMS + p ESI Full ms [50.0000-750.0000]

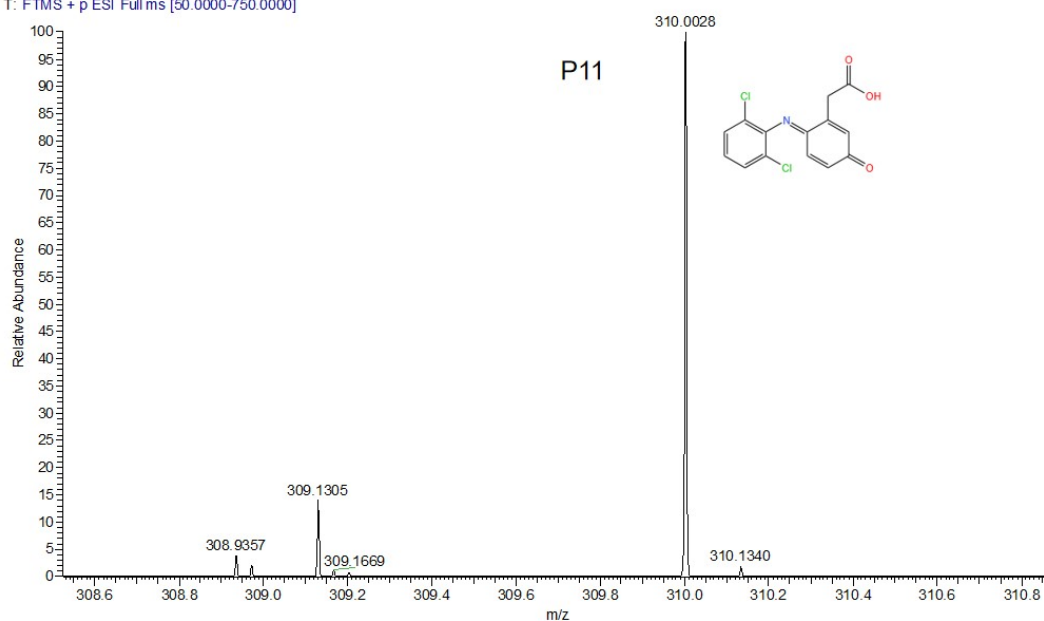

1 #3973 RT: 13.56 AV: 1 NL: 1.22E6  
T: FTMS + p ESI Full ms [50.0000-750.0000]

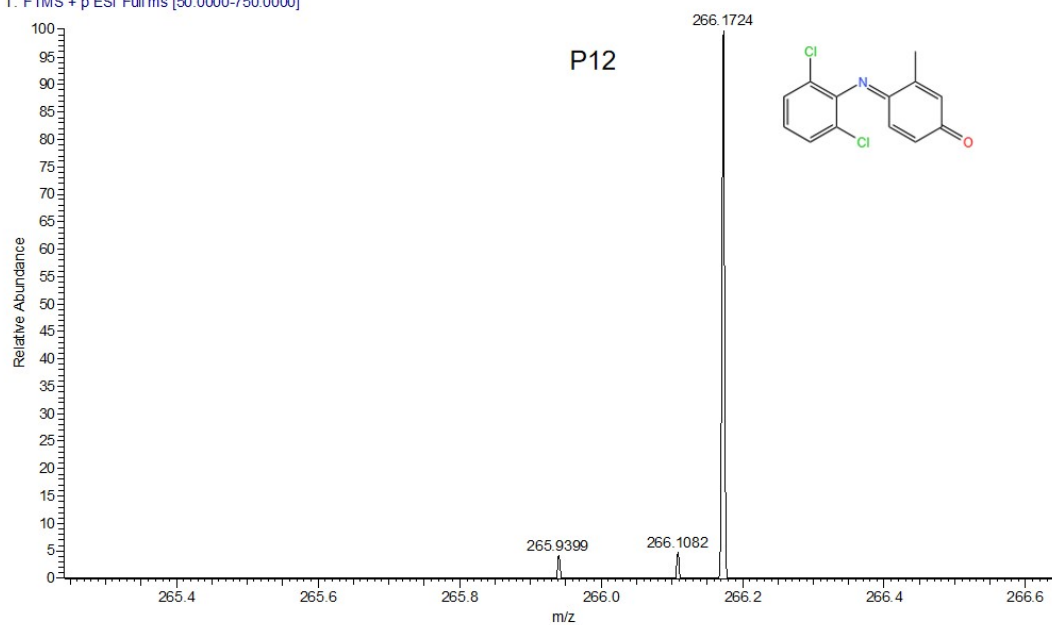

1 #3996 RT: 13.63 AV: 1 NL: 1.71E7  
T: FTMS + p ESI Full ms [50.0000-750.0000]

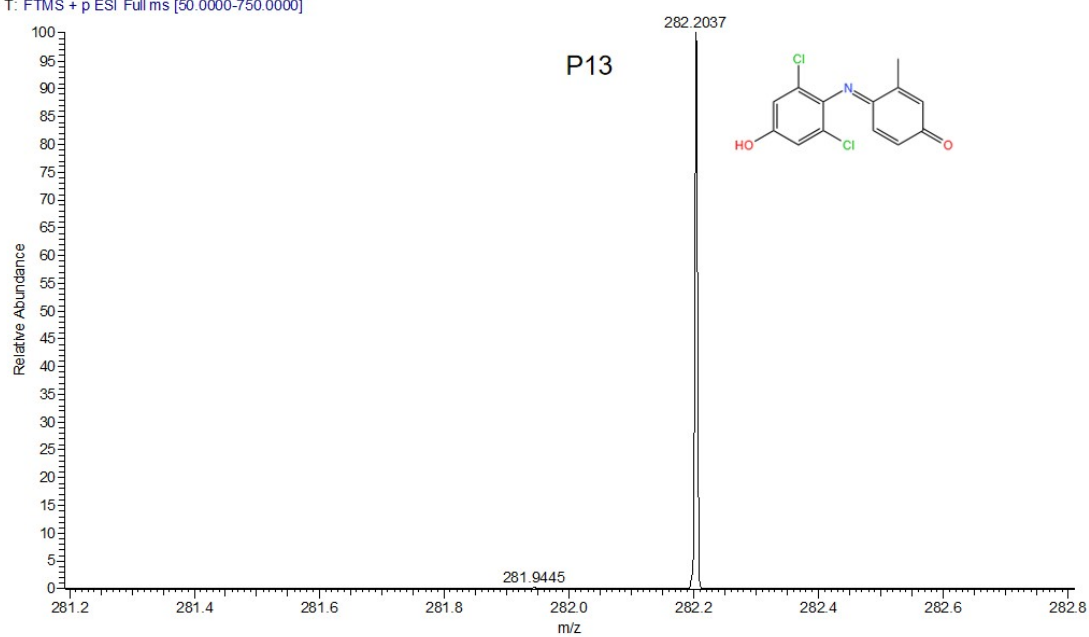

1 #77 RT: 0.27 AV: 1 NL: 1.03E6  
T: FTMS + p ESI Full ms [50.0000-750.0000]

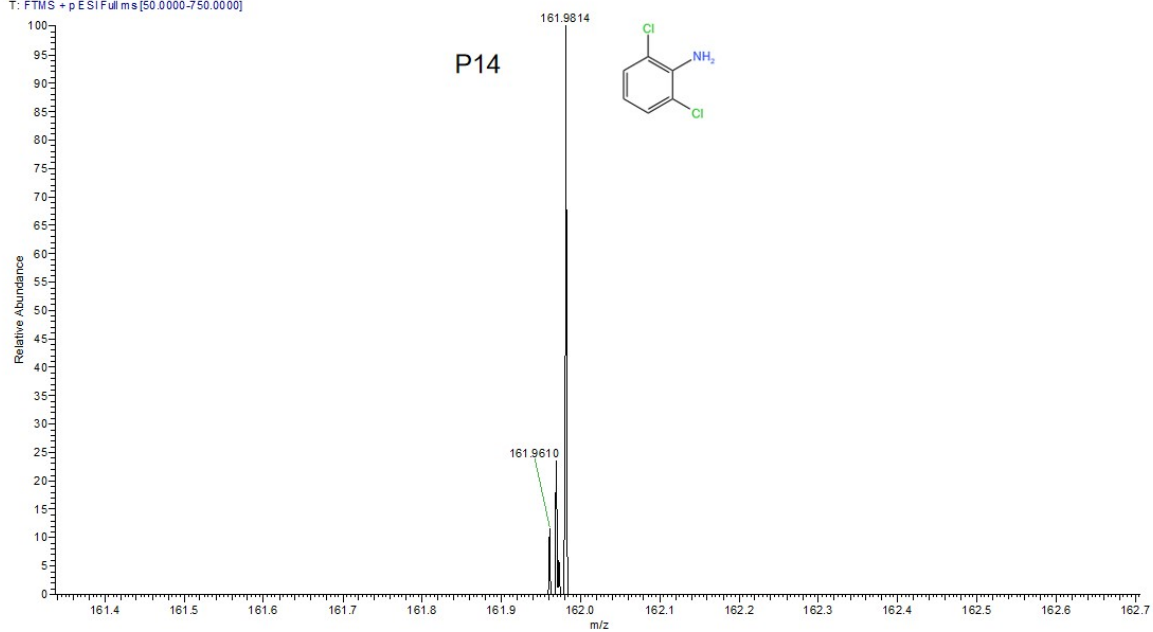

**Fig. S10** Liquid chromatogram of DCF intermediate.

## References

1. A. Ahmed, A. Hezam, J. Rabeah, C. Kreyenschulte, N. Steinfeldt, S. Wohlrab and J. Strunk, Bi<sub>2</sub>O<sub>2.33</sub>/Bi<sub>4</sub>O<sub>5</sub>I<sub>2</sub>-heterojunction photocatalysts for adsorption and visible light-driven degradation of pharmaceutical pollutants, *Catalysis Today*, 2024, 445, 115093.
2. X. Zhang, W. Li, Y. Lei, J. He, Y. Huang and W. Tan, Biomass C-doped three-dimensional Bi<sub>2</sub>WO<sub>6</sub> for enhanced visible-light-driven photodegradation of diclofenac and rhodamine B, *Ceramics International*, 2024, 50, 18594-18608.
3. M. Aldrdery, M. Aadil, S. R. Ejaz, A. Khalid, F. Alresheedi, H. D. Alkhaldi, M. I. Saleem, A. E. Jery and M. R. Alrahili, Synergistic role of indium doping and g-C<sub>3</sub>N<sub>4</sub> reinforcement in boosting the visible light-triggered rhodamine B and diclofenac sodium salt degradation over rare earth molybdate, *Surfaces and Interfaces*, 2024, 54, 105232.
4. J. Nieto-Sandoval, A. Torres-Pinto, M. Pedrosa, M. Munoz, Z. M. de Pedro, C. G. Silva, J. L. Faria, J. A. Casas and A. M. T. Silva, Application of g-C<sub>3</sub>N<sub>4</sub>-PVDF membrane for the photocatalytic degradation of micropollutants in continuous flow mode: Impact of water matrix, *Journal of Environmental Chemical Engineering*, 2023, 11, 110586.
5. L. Heon, P. Jaegu, L. Su Shiung, P. Young-Kwon, K. Sang-Chai and J. Sang-Chul, Diclofenac degradation properties of a La-doped visible light-responsive TiO<sub>2</sub> photocatalyst, *Sustainable Chemistry and Pharmacy*, 2021, 25, 100564.
6. C. Sanchez Tobon, I. Panžić, A. Bafti, G. Matijašić, D. Ljubas and L. Ćurković, Rapid Microwave-Assisted Synthesis of N/TiO<sub>2</sub>/rGO Nanoparticles for the Photocatalytic Degradation of Pharmaceuticals, *Nanomaterials*, 2022, 12, 3975.
7. W. Zhang, L. Zhou and H. Deng, Ag modified g-C<sub>3</sub>N<sub>4</sub> composites with enhanced visible-light photocatalytic activity for diclofenac degradation, *Journal of Molecular Catalysis A: Chemical*, 2016, 423, 270-276.
8. L. Das, S. K. Barodia, S. Sengupta and J. K. Basu, Aqueous degradation kinetics of pharmaceutical drug diclofenac by photocatalysis using nanostructured titania–zirconia composite catalyst, *International Journal of Environmental Science and Technology*, 2014, 12, 317–326.
9. I. A. Garbusova, V. T. Alexanjan, L. A. Leites, I. R. Golding and A. M. Sladkov,

Vibrational spectra of phenylethynylcopper(I), *Journal of Organometallic Chemistry*, 1973, 54, 341-344.

10. G.-Y. Zhao, H.-Y. Li, Y. Yang, Q.-H. Zhao, T.-T. Su and J.-L. Ma, Facile one-step synthesis of  $\text{PhC}_2\text{Cu}$  nanowires with enhanced photocatalytic performance, *Environmental Science and Pollution Research*, 2022, 29, 89681–89690.
